# Supplementary material
Source: ML conference proceedings conference paper supplement (https://proceedings.neurips.cc/paper_files/paper/2023/hash/661c37f3b098bdee53fd7d9c4ef6964a-Abstract.html)
Supplement: Supplementary file 1 [file 661c37f3b098bdee53fd7d9c4ef6964a-Supplemental-Conference.pdf]

---

# Guiding Diffusion Models for Versatile Face Restoration via Partial Guidance

– Supplementary Material –

---

Anonymous Author(s)

Affiliation

Address

email

1 In this supplementary material, we provide additional discussions and results. In Sec. A, we present  
2 additional implementation details including the inference requirements, choice of hyperparameters  
3 involved in the inference process, and discussions on the pre-trained restorer for blind face restoration.  
4 In Sec. B, we provide more results on various tasks, *i.e.*, blind face restoration, old photo restoration,  
5 reference-based restoration, face colorization and inpainting. Sec. C and Sec. D discuss the limitations  
6 and potential negative societal impacts of our work, respectively.

## 7 A Implementation Details

### 8 A.1 Inference Requirements

9 The pre-trained diffusion model we employ is a  $512 \times 512$  denoising network trained on the FFHQ  
10 dataset [5] provided by [20]. The inference process is carried out on NVIDIA RTX A5000 GPU.

### 11 A.2 Inference Hyperparameters

12 During the inference process, there involves hyperparameters belonging to three categories. **(1)**  
13 **Sampling Parameters:** The parameters in the sampling process (*e.g.*, gradient scale  $s$ ). **(2) Par-**  
14 **tial Guidance Parameters:** Additional parameters introduced by our partial guidance, which are  
15 mainly relative weights for properties involved in a certain task (*e.g.*,  $\alpha$  that controls the relative  
16 importance between the structure and color guidance in face colorization). **(3) Optional Parameters:**  
17 Parameters for optional quality enhancement (*e.g.*, the range for multiple gradient steps to take place  
18  $[S_{start}, S_{end}]$ ). While it is principally flexible to tune the hyperparameters case by case, we provide  
19 a set of default parameter choices for each homogeneous task in Table 1.

Table 1: Default hyperparameter settings in our experiments.

| Task                  | Sampling   |      | Partial Guidance        |                 |                     |                     |                                     | Optional      |               |                 |          |
|-----------------------|------------|------|-------------------------|-----------------|---------------------|---------------------|-------------------------------------|---------------|---------------|-----------------|----------|
|                       | $s_{norm}$ | $s$  | Unmasked Region         | Lightness       | Color Statistics    | Smooth Semantics    | Identity Reference                  | $N = 2$       | $N = 3$       | Perceptual Loss | GAN Loss |
| Restoration           |            | 0.1  | -                       | -               | -                   | $\mathcal{L}_{res}$ | -                                   | $T \sim 0.5T$ | $T \sim 0.7T$ | 1e-2            | 1e-2     |
| Colorization          | ✓          | 0.01 | -                       | $\mathcal{L}_l$ | $0.01\mathcal{L}_c$ | -                   | -                                   | -             | -             | -               | -        |
| Inpainting            | ✓          | 0.1  | $\mathcal{L}_{inpaint}$ | -               | -                   | -                   | -                                   | -             | -             | -               | -        |
| Ref-Based Restoration |            | 0.1  | -                       | -               | -                   | $\mathcal{L}_{res}$ | $100\text{sim}(v_{\hat{x}_0}, v_r)$ | $T \sim 0.5T$ | $T \sim 0.7T$ | 1e-2            | 1e-2     |

### 20 A.3 Restorer Design

21 **Network Structure.** In the blind face restoration task, given an input low-quality (LQ) image  $y_0$ ,  
22 we adopt a pre-trained face restoration model  $f$  to predict smooth semantics as partial guidance. In  
23 this work, we employ the  $\times 1$  generator of Real-ESRGAN [17] as our restoration backbone. The  
24 network follows the basic structure of SRResNet [6], with RRDB being its basic blocks. In a  $\times 1$

25 generator, the input image is first downsampled 4 times by a pixel unshuffling [14] layer before any  
 26 convolution operations. In our work, we deal with  $512 \times 512$  input/output pairs, which means that  
 27 most computation is done only in a  $128 \times 128$  resolution scale. To employ it as the restorer  $f$ , we  
 28 modify some of its settings. Empirically we find that adding  $x_t$  and  $t$  as the input alongside  $y_0$  can  
 29 enhance the sample quality in terms of sharpness. Consequently, the input to  $f$  is a concatenation of  
 30  $y_0$ ,  $x_t$ , and  $t$ , with  $t$  embedded with the sinusoidal timestep embeddings [15].

31 **Training Details.**  $f$  is implemented with the PyTorch framework and trained using four NVIDIA  
 32 Tesla V100 GPUs at 200K iterations. We train  $f$  with the FFHQ [5] and CelebA-HQ [4] datasets and  
 33 form training pairs by synthesizing LQ images  $I_l$  from their HQ counterparts  $I_h$ , following a common  
 34 pipeline with a second-order degradation model [17, 7, 16, 19]. Since our goal is to obtain *smooth*  
 35 *semantics* without hallucinating unnecessary high-frequency details, **it is sufficient to optimize the**  
 36 **model  $f$  solely with the MSE loss.**

37 **Model Analysis.** To investigate the most effective restorer for blind face restoration, we compare the  
 38 sample quality with restorer being  $f(y_0)$  and  $f(y_0, x_t, t)$ , respectively. Here,  $f(y_0, x_t, t)$  is the one  
 39 trained by ourselves as discussed above, and  $f(y_0)$  is SwinIR [9] from DifFace [20], which is also  
 40 trained with MSE loss only. As shown in Fig.1, when all the other inference settings are the same, we  
 41 find that the sample quality with restorer  $f(y_0, x_t, t)$  is higher in terms of sharpness compared with  
 42 that of  $f(y_0)$ . One may choose to sacrifice a certain degree of sharpness to achieve higher inference  
 43 speed by substituting the restorer with  $f(y_0)$ , whose output is constant throughout  $T$  timesteps.

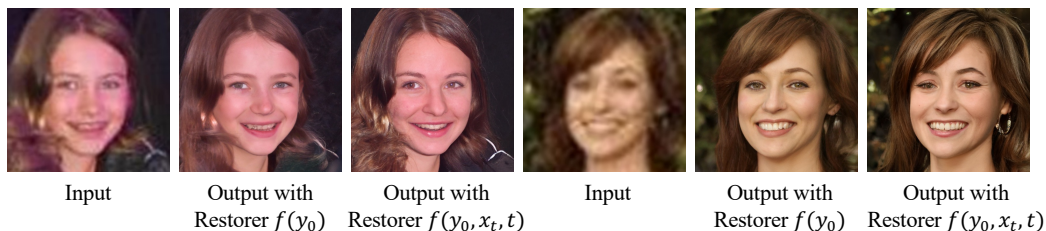

Figure 1: Visual comparison of the restoration outputs with different restorers  $f$  in blind restoration. We observe that including  $x_t$  and  $t$  as the input to  $f$  enhances the sharpness of the restored images.

## 44 B More Results

### 45 B.1 More Results on Blind Face Restoration

46 In this section, we provide quantitative and more qualitative comparisons with state-of-the-art  
 47 methods, including (1) task-specific CNN/Transformer-based restoration methods: PULSE [11],  
 48 GFP-GAN [16], and CodeFormer [21] and (2) diffusion-prior-based methods: GDP [2], DDNM [18]  
 49 and DifFace [20].

50 To compare our performance with other methods quantitatively, we adopt FID [3] and NIQE [12] as  
 51 the evaluation metrics and test on three real-world datasets: LFW-Test [16], WebPhoto-Test [16], and  
 52 WIDER-Test [21]. LFW-Test consists of the first image from each person whose name starting with  
 53 A in the LFW dataset [16], which are 431 images in total. WebPhoto-Test is a dataset comprising 407  
 54 images with medium degradations collected from the Internet. WIDER-Test contains 970 severely  
 55 degraded images from the WIDER Face dataset [16]. As shown in Table 2, our method achieves best  
 56 or second-best scores across all three datasets for both metrics. Although GFP-GAN achieves the  
 57 best NIQE scores across datasets, notable artifacts can be observed as shown in Fig. 2. Meanwhile,  
 58 our method shows exceptional robustness and produces visually pleasing outputs without artifacts.

Table 2: Quantitative comparison on the *real-world* **LFW-Test**, **WebPhoto-Test**, and **WIDER-Test**. **Red** and **blue** indicate the best and the second best performance, respectively.

| Dataset              | Metric | CNN/Transformer-based Methods |              |                 | Diffusion-prior-based Methods |           |              | Ours         |
|----------------------|--------|-------------------------------|--------------|-----------------|-------------------------------|-----------|--------------|--------------|
|                      |        | PULSE [11]                    | GFP-GAN [16] | CodeFormer [21] | GDP [2]                       | DDNM [18] | DifFace [20] |              |
| <b>LFW-Test</b>      | FID↓   | 84.02                         | 72.45        | 74.10           | 118.04                        | 122.43    | <b>67.98</b> | <b>71.62</b> |
|                      | NIQE↓  | 4.98                          | <b>3.90</b>  | 4.52            | 8.60                          | 9.24      | 5.47         | <b>4.15</b>  |
| <b>WebPhoto-Test</b> | FID↓   | 88.18                         | 91.43        | <b>86.19</b>    | 163.28                        | 161.35    | 90.58        | <b>86.18</b> |
|                      | NIQE↓  | 4.84                          | <b>4.13</b>  | 4.65            | 10.61                         | 10.76     | 4.48         | <b>4.34</b>  |
| <b>WIDER-Test</b>    | FID↓   | 71.31                         | 40.93        | 40.26           | 193.20                        | 153.99    | <b>38.54</b> | <b>39.17</b> |
|                      | NIQE↓  | 4.83                          | <b>3.77</b>  | 4.12            | 14.33                         | 11.68     | 4.44         | <b>3.93</b>  |

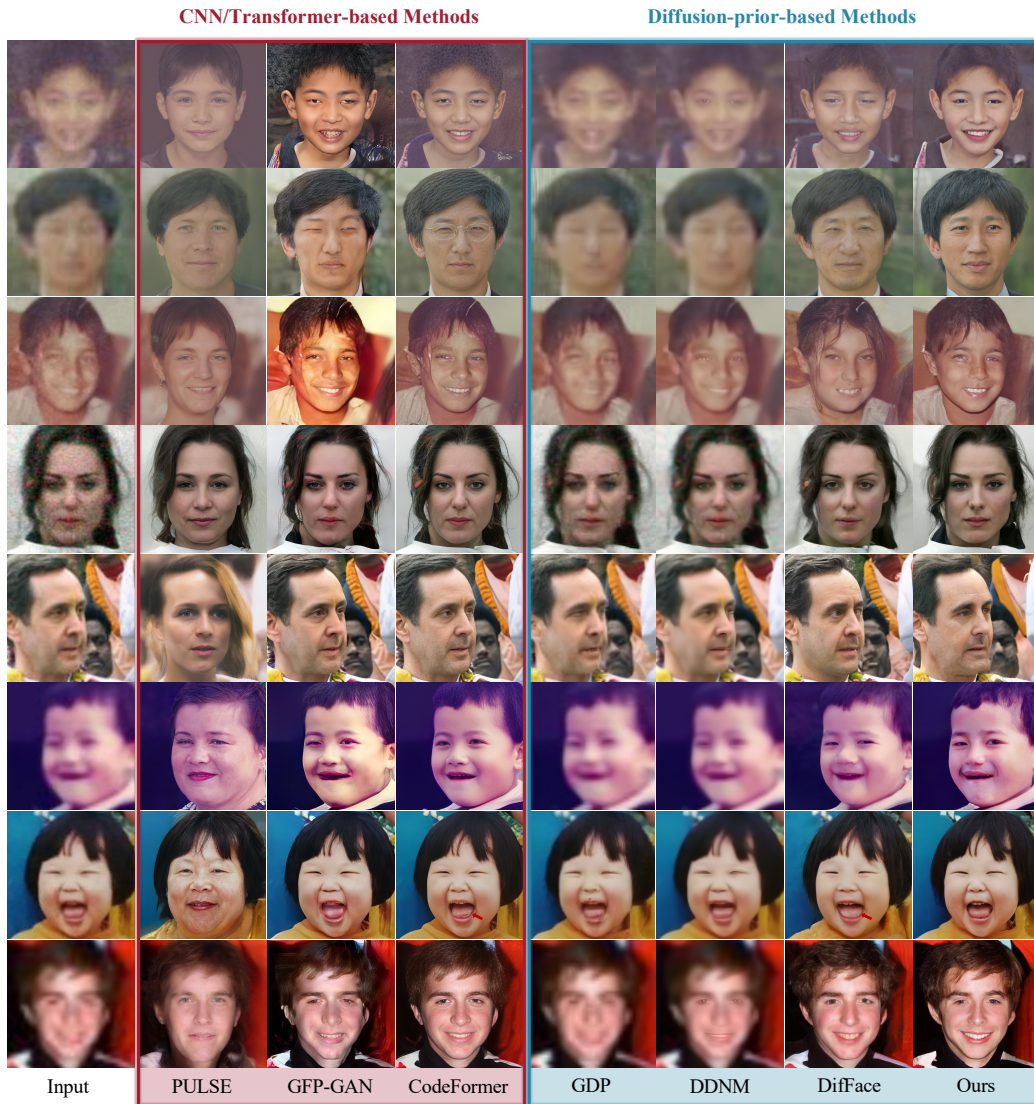

Figure 2: **Comparison on Blind Face Restoration.** Input faces are corrupted by real-world degradations. Our method produces high-quality faces with faithful details. (**Zoom in for best view**)

59 **B.2 More Results on Old Photo Restoration**

60 We provide more visual results of old photo restoration on challenging cases both with and without  
61 scratches, as shown in Fig. 3. The test images come from both the CelebChild-Test dataset [16]  
62 and the Internet. We compare our method with GFP-GAN (v1) [16] and DDNM [18]. Our method  
63 demonstrates an obvious advantage in sample quality especially in terms of vibrant colors, fine  
64 details, and sharpness.

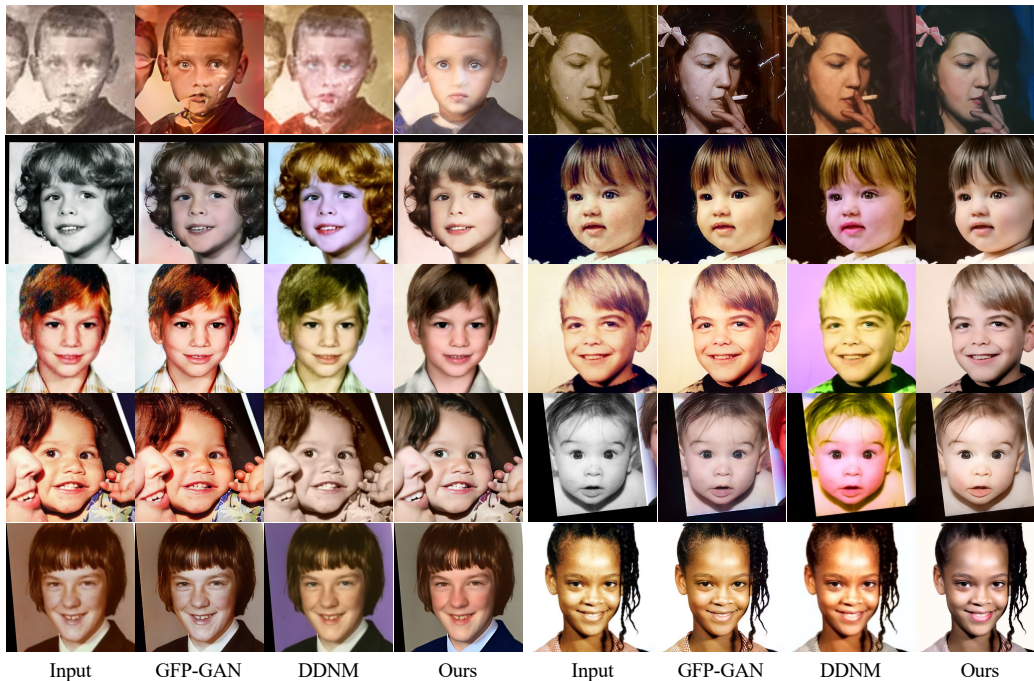

Figure 3: **Comparison on Old Photo Restoration on Challenging Cases.** Our method is able to produce high-quality restored outputs with natural color and complete faces.

65 **B.3 More Results on Reference-Based Restoration**

66 We provide more visual results on the reference-based restoration in Fig. 4, which is our exploratory  
67 extension based on blind face restoration. Test images come from the CelebRef-HQ dataset [8],  
68 which contains 1,005 entities and each person has 3 to 21 high-quality images. With identity loss  
69 added, we observe that our method is able to produce personal characteristics similar to those of the  
70 ground truth.

71 **B.4 More Results on Face Inpainting**

72 In this section, we provide more qualitative comparisons with state-of-the-art methods in Fig. 5,  
73 including (1) task-specific methods: GPEN [19] and CodeFormer [21] and (2) diffusion-prior-based  
74 methods: GDP [2] and DDNM [18]. Since the pre-trained diffusion model DDNM employs [10] is  
75 trained on the CelebA-HQ dataset [4], we take the CelebRef-HQ [8] dataset for testing. Our method  
76 is able to recover challenging structures such as glasses. Moreover, diverse and photo-realism outputs  
77 can be obtained by setting different random seeds.

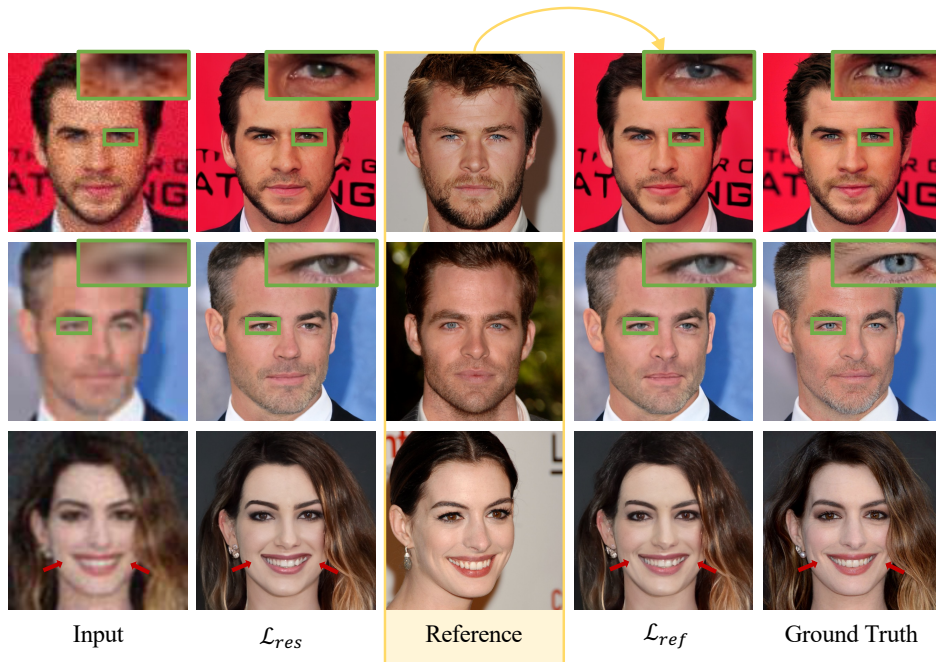

Figure 4: **Comparison on Reference-Based Face Restoration.** Our method produces personal characteristics which are hard to recover without reference.

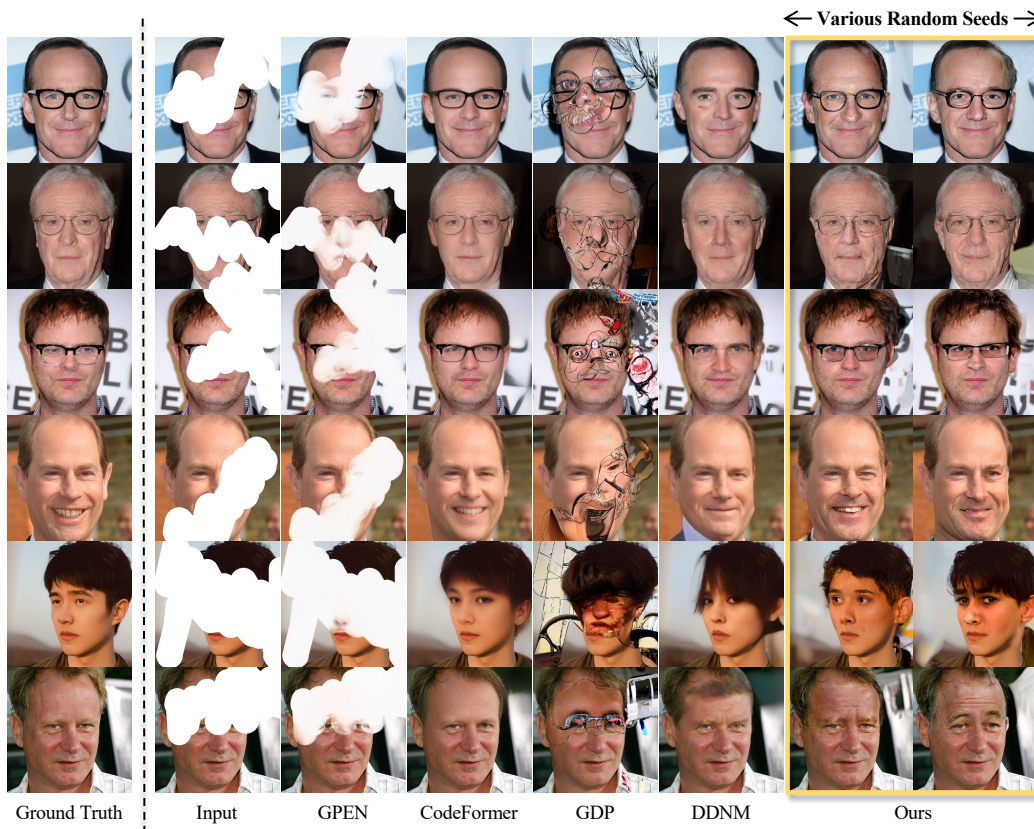

Figure 5: **Comparison on Face Inpainting on Challenging Cases.** Our method produces natural outputs with pleasant details coherent to the unmasked regions. Moreover, different random seeds give various contents of high quality.

78 **B.5 More Results on Face Colorization**

79 In this section, we provide more qualitative comparisons with state-of-the-art methods in Fig. 6,  
 80 including (1) task-specific methods: CodeFormer [21] and (2) diffusion-prior-based methods: GDP [2]  
 81 and DDNM [18]. Even though the test images come from the CelebA-HQ dataset [4], our method  
 82 still produces more vibrant colors and finer details than DDNM. Moreover, our method demonstrates  
 83 a desirable diversity by guiding with various color statistics.

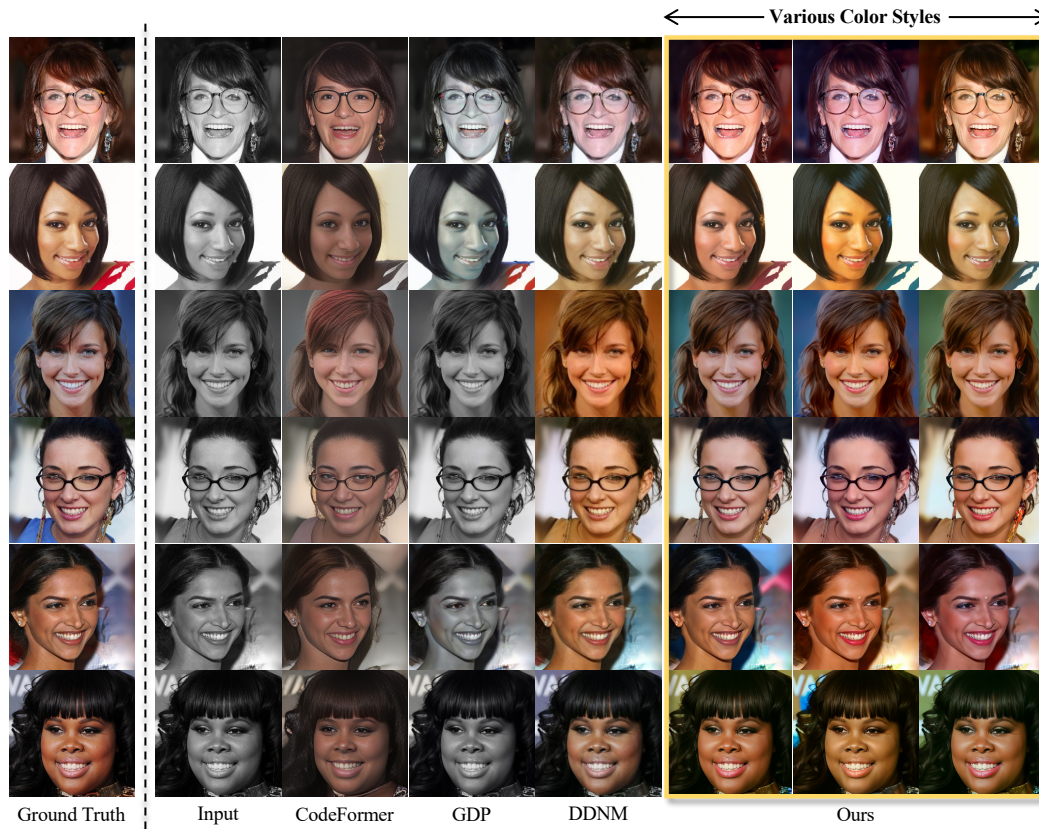

Figure 6: **Comparison on Face Colorization.** Our method produces diverse colorized outputs with various color statistics given as guidance.

84 **C Limitations**

85 As our partial guidance is based on a pre-trained diffusion model, our performance largely depends  
86 on the capability of the model in use. In addition, since a face-specific diffusion model is adopted  
87 in this work, our method is applicable only on faces in its current form. Nevertheless, this problem  
88 can be resolved by adopting stronger models trained for generic objects. For example, as shown in  
89 Fig. 7, we employ an unconditional  $256 \times 256$  diffusion model trained on the ImageNet dataset [13]  
90 provided by [1], and achieve promising results on inpainting and colorization. Further exploration  
91 on natural scene restoration will be left as our future work.

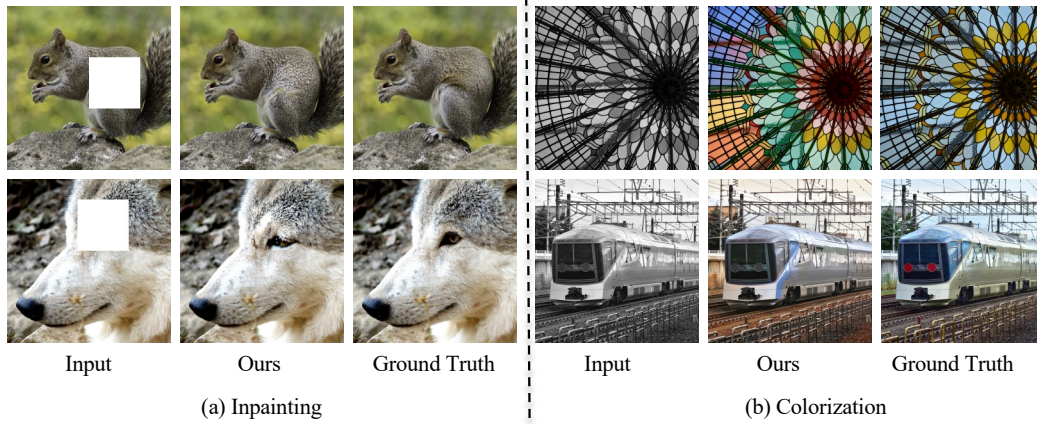

Figure 7: Extension on natural images for the inpainting and colorization tasks. By employing an unconditional  $256 \times 256$  diffusion model trained on the ImageNet dataset [13] provided by [1], our method achieves promising results.

92 **D Broader Impacts**

93 This work focuses on restoring images corrupted by various forms of degradations. On the one  
94 hand, our method is capable of enhancing the quality of images, improving user experiences. On  
95 the other hand, our method could generate inaccurate outputs, especially when the input is heavily  
96 corrupted. This could potentially lead to deceptive information, such as incorrect identity recognition.  
97 In addition, similar to other restoration algorithms, our method could be used by malicious users for  
98 data falsification. We advise the public to use our method with care.

99 **References**

- 100 [1] Prafulla Dhariwal and Alexander Nichol. Diffusion models beat GANs on image synthesis. In  
101 *NeurIPS*, 2021.
- 102 [2] Ben Fei, Zhaoyang Lyu, Liang Pan, Junzhe Zhang, Weidong Yang, Tianyue Luo, Bo Zhang, and  
103 Bo Dai. Generative diffusion prior for unified image restoration and enhancement. In *CVPR*,  
104 2023.
- 105 [3] Martin Heusel, Hubert Ramsauer, Thomas Unterthiner, Bernhard Nessler, and Sepp Hochreiter.  
106 GANs trained by a two time-scale update rule converge to a local nash equilibrium. In *NeurIPS*,  
107 2017.
- 108 [4] Tero Karras, Timo Aila, Samuli Laine, and Jaakko Lehtinen. Progressive growing of GANs for  
109 improved quality, stability, and variation. In *ICLR*, 2018.
- 110 [5] Tero Karras, Samuli Laine, and Timo Aila. A style-based generator architecture for generative  
111 adversarial networks. In *CVPR*, 2019.
- 112 [6] Christian Ledig, Lucas Theis, Ferenc Huszár, Jose Caballero, Andrew Cunningham, Alejandro  
113 Acosta, Andrew Aitken, Alykhan Tejani, Johannes Totz, Zehan Wang, et al. Photo-realistic  
114 single image super-resolution using a generative adversarial network. In *CVPR*, 2017.
- 115 [7] Xiaoming Li, Chaofeng Chen, Shangchen Zhou, Xianhui Lin, Wangmeng Zuo, and Lei Zhang.  
116 Blind face restoration via deep multi-scale component dictionaries. In *ECCV*, 2020.
- 117 [8] Xiaoming Li, Shiguang Zhang, Shangchen Zhou, Lei Zhang, and Wangmeng Zuo. Learning  
118 dual memory dictionaries for blind face restoration. *TPAMI*, 2022.
- 119 [9] Jingyun Liang, Jiezhong Cao, Guolei Sun, Kai Zhang, Luc Van Gool, and Radu Timofte.  
120 SwinIR: Image restoration using swin transformer. In *ICCV*, 2021.
- 121 [10] Andreas Lugmayr, Martin Danelljan, Andres Romero, Fisher Yu, Radu Timofte, and Luc  
122 Van Gool. RePaint: Inpainting using denoising diffusion probabilistic models. In *CVPR*, 2022.
- 123 [11] Sachit Menon, Alexandru Damian, Shijia Hu, Nikhil Ravi, and Cynthia Rudin. PULSE: Self-  
124 supervised photo upsampling via latent space exploration of generative models. In *CVPR*,  
125 2020.
- 126 [12] Anish Mittal, Rajiv Soundararajan, and Alan C Bovik. Making a “completely blind” image  
127 quality analyzer. *IEEE Signal Processing Letters*, 20(3):209–212, 2012.
- 128 [13] Olga Russakovsky, Jia Deng, Hao Su, Jonathan Krause, Sanjeev Satheesh, Sean Ma, Zhiheng  
129 Huang, Andrej Karpathy, Aditya Khosla, Michael Bernstein, et al. ImageNet large scale visual  
130 recognition challenge. *IJCV*, 115:211–252, 2015.
- 131 [14] Wenzhe Shi, Jose Caballero, Ferenc Huszár, Johannes Totz, Andrew P Aitken, Rob Bishop,  
132 Daniel Rueckert, and Zehan Wang. Real-time single image and video super-resolution using an  
133 efficient sub-pixel convolutional neural network. In *CVPR*, 2016.
- 134 [15] Ashish Vaswani, Noam Shazeer, Niki Parmar, Jakob Uszkoreit, Llion Jones, Aidan N Gomez,  
135 Łukasz Kaiser, and Illia Polosukhin. Attention is all you need. In *NeurIPS*, 2017.
- 136 [16] Xintao Wang, Yu Li, Honglun Zhang, and Ying Shan. Towards real-world blind face restoration  
137 with generative facial prior. In *CVPR*, 2021.
- 138 [17] Xintao Wang, Liangbin Xie, Chao Dong, and Ying Shan. Real-ESRGAN: Training real-world  
139 blind super-resolution with pure synthetic data. In *ICCV*, 2021.
- 140 [18] Yinhuai Wang, Jiwen Yu, and Jian Zhang. Zero-shot image restoration using denoising diffusion  
141 null-space model. In *ICLR*, 2023.
- 142 [19] Tao Yang, Peiran Ren, Xuansong Xie, and Lei Zhang. GAN prior embedded network for blind  
143 face restoration in the wild. In *CVPR*, 2021.



- 144 [20] Zongsheng Yue and Chen Change Loy. DifFace: Blind face restoration with diffused error  
145 contraction. *arXiv preprint arXiv:2212.06512*, 2022.
- 146 [21] Shangchen Zhou, Kelvin C.K. Chan, Chongyi Li, and Chen Change Loy. Towards robust blind  
147 face restoration with codebook lookup transformer. In *NeurIPS*, 2022.
